# Supplementary material for: Serratia marcescens Outbreak at a Correctional Facility: Environmental Sampling, Laboratory Analyses and Genomic Characterization to Assess Sources and Persistence
Source: MDPI journal article supplement (doi:10.3390/ijerph20176709), 2023-09-04
Supplement: s1 [file s1]

**Table S2.** Raw and standardized counts of eight categories of virulence genes.

| Sample ID<br>(Sample ID-Isolate#; Source; Collection Date) | Virulence |          | Betain/Proline |          | Biofilm |          | Fimbria |          | Flagel |          | Hemolysin |          | Siderophore |          | Toxins |          | Total |
|------------------------------------------------------------|-----------|----------|----------------|----------|---------|----------|---------|----------|--------|----------|-----------|----------|-------------|----------|--------|----------|-------|
|                                                            | Count     | Standard | Count          | Standard | Count   | Standard | Count   | Standard | Count  | Standard | Count     | Standard | Count       | Standard | Count  | Standard |       |
| Patient 1: Blood; 2021-Jan-02                              | 8         | 0.17     | 13             | -0.33    | 5       | 0.41     | 33      | -0.62    | 40     | 0.19     | 18        | 0.44     | 10          | -0.63    | 50     | 0.99     | 177   |
| Patient 2-3: Blood; 2021-May-12                            | 8         | 0.17     | 13             | -0.33    | 5       | 0.41     | 33      | -0.62    | 40     | 0.19     | 18        | 0.44     | 10          | -0.63    | 49     | 0.82     | 176   |
| Patient 3-1: Epidural abscess ; 2021-Jul-06                | 8         | 0.17     | 13             | -0.33    | 5       | 0.41     | 33      | -0.62    | 40     | 0.19     | 18        | 0.44     | 10          | -0.63    | 49     | 0.82     | 176   |
| Patient 4: Wound; 2021-Jan-24                              | 8         | 0.17     | 13             | -0.33    | 5       | 0.41     | 33      | -0.62    | 40     | 0.19     | 18        | 0.44     | 10          | -0.63    | 50     | 0.99     | 177   |
| Patient 9: Blood; 2022-Jun-08                              | 8         | 0.17     | 13             | -0.33    | 5       | 0.41     | 33      | -0.62    | 40     | 0.19     | 18        | 0.44     | 10          | -0.63    | 51     | 1.15     | 178   |
| Patient 10: Wound; 2022-Jul-11                             | 8         | 0.17     | 13             | -0.33    | 5       | 0.41     | 33      | -0.62    | 40     | 0.19     | 18        | 0.44     | 10          | -0.63    | 50     | 0.99     | 177   |
| Patient 11: Blood; 2022-Aug-03                             | 8         | 0.17     | 13             | -0.33    | 5       | 0.41     | 31      | -0.95    | 40     | 0.19     | 18        | 0.44     | 10          | -0.63    | 49     | 0.82     | 174   |
| Sample C: Nasacort w/ Methamphetamine; 2021-Jul-06         | 9         | 0.51     | 13             | -0.33    | 5       | 0.41     | 33      | -0.62    | 40     | 0.19     | 18        | 0.44     | 10          | -0.63    | 49     | 0.82     | 177   |
| Sample I-1: Surrendered Needles; 2021-May-17               | 8         | 0.17     | 13             | -0.33    | 5       | 0.41     | 33      | -0.62    | 40     | 0.19     | 18        | 0.44     | 10          | -0.63    | 50     | 0.99     | 177   |
| Sample I-3: Surrendered Needles; 2021-May-17               | 8         | 0.17     | 13             | -0.33    | 5       | 0.41     | 33      | -0.62    | 40     | 0.19     | 18        | 0.44     | 10          | -0.63    | 49     | 0.82     | 176   |
| Sample A-3: CB64 Dilution Machine; 2021-Mar-05             | 8         | 0.17     | 12             | -2.13    | 5       | 0.41     | 27      | -1.60    | 40     | 0.19     | 18        | 0.44     | 9           | -0.99    | 51     | 1.15     | 170   |
| Sample F: Scrubie 3; 2021-May-17                           | 13        | 1.84     | 13             | -0.33    | 5       | 0.41     | 32      | -0.79    | 40     | 0.19     | 18        | 0.44     | 9           | -0.99    | 49     | 0.82     | 179   |
| Sample A-1: CB64 Dilution Machine; 2021-Mar-05             | 8         | 0.17     | 15             | 3.26     | 5       | 0.41     | 41      | 0.68     | 40     | 0.19     | 16        | -0.82    | 10          | -0.63    | 46     | 0.32     | 181   |
| Sample D-2: Scrubie; 2021-May-07                           | 18        | 3.52     | 14             | 1.46     | 5       | 0.41     | 35      | -0.30    | 40     | 0.19     | 20        | 1.70     | 10          | -0.63    | 49     | 0.82     | 191   |
| Patient 17: Joint Fluid; 2021-Mar-12                       | 8         | 0.17     | 14             | 1.46     | 5       | 0.41     | 37      | 0.03     | 40     | 0.19     | 19        | 1.07     | 10          | -0.63    | 45     | 0.15     | 178   |
| Sample L: Diluted CB64; 2021-Aug-04                        | 9         | 0.51     | 13             | -0.33    | 5       | 0.41     | 31      | -0.95    | 40     | 0.19     | 18        | 0.44     | 11          | -0.28    | 40     | -0.69    | 167   |
| Sample G: Shower Floor; 2021-Aug-04                        | 4         | -1.16    | 13             | -0.33    | 5       | 0.41     | 43      | 1.01     | 40     | 0.19     | 17        | -0.19    | 15          | 1.14     | 35     | -1.52    | 172   |
| Sample K: Cleaner; 2021-Aug-13                             | 5         | -0.83    | 13             | -0.33    | 5       | 0.41     | 42      | 0.85     | 40     | 0.19     | 18        | 0.44     | 18          | 2.21     | 38     | -1.02    | 179   |
| Sample J: Detergent; 2021-Aug-13                           | 5         | -0.83    | 13             | -0.33    | 5       | 0.41     | 42      | 0.85     | 40     | 0.19     | 18        | 0.44     | 18          | 2.21     | 38     | -1.02    | 179   |
| Patient 5: Blood; 2021-Jan-11                              | 4         | -1.16    | 13             | -0.33    | 5       | 0.41     | 41      | 0.68     | 39     | -2.41    | 17        | -0.19    | 15          | 1.14     | 38     | -1.02    | 172   |
| Sample B: Coffee from Cup; 2021-Jul-06                     | 4         | -1.16    | 13             | -0.33    | 5       | 0.41     | 41      | 0.68     | 39     | -2.41    | 17        | -0.19    | 15          | 1.14     | 38     | -1.02    | 172   |
| Sample H: Sterile Saline Hand Rinsate; 2021-Jul-08         | 4         | -1.16    | 13             | -0.33    | 5       | 0.41     | 41      | 0.68     | 39     | -2.41    | 17        | -0.19    | 15          | 1.14     | 38     | -1.02    | 172   |
| Patient 6: Wound; 2021-Aug-28                              | 6         | -0.50    | 13             | -0.33    | 4       | -2.35    | 41      | 0.68     | 40     | 0.19     | 13        | -2.70    | 15          | 1.14     | 39     | -0.86    | 171   |
| Patient 7-2: Blood; 2021-Apr-09                            | 7         | -0.16    | 13             | -0.33    | 4       | -2.35    | 54      | 2.80     | 40     | 0.19     | 14        | -2.07    | 9           | -0.99    | 41     | -0.52    | 182   |
| Patient 8: Urine Catheter; 2021-Mar-11                     | 9         | 0.51     | 14             | 1.46     | 5       | 0.41     | 45      | 1.34     | 41     | 2.79     | 18        | 0.44     | 15          | 1.14     | 38     | -1.02    | 185   |
| Patient 12: Knee; 2022-April-08                            | 4         | -1.16    | 14             | 1.46     | 4       | -2.35    | 44      | 1.17     | 40     | 0.19     | 15        | -1.45    | 11          | -0.28    | 40     | -0.69    | 172   |
| Sample E-2: Scrubie; 2021-May-17                           | 5         | -0.83    | 13             | -0.33    | 4       | -2.35    | 29      | -1.28    | 40     | 0.19     | 14        | -2.07    | 13          | 0.43     | 32     | -2.03    | 150   |

**Table S3.** Loadings of each virulence-related gene category for each principal component (PC) from principal components analysis and the percent variation explained (shaded in gray) by each PC.

|                                    | PC 1   | PC 2   | PC 3   | PC 4   | PC 5   | PC 6   | PC 7   | PC 8   |
|------------------------------------|--------|--------|--------|--------|--------|--------|--------|--------|
| <i>Virulence Reg</i>               | 0.414  | 0.299  | 0.119  | -0.014 | -0.321 | 0.754  | 0.122  | -0.197 |
| <i>Proline/Betaine</i>             | -0.023 | 0.485  | 0.552  | -0.422 | -0.316 | -0.405 | 0.105  | 0.085  |
| <i>Hemolysin</i>                   | 0.419  | -0.287 | 0.401  | 0.090  | 0.060  | 0.078  | -0.372 | 0.652  |
| <i>Biofilm</i>                     | 0.339  | -0.434 | 0.436  | -0.011 | 0.153  | -0.193 | -0.003 | -0.668 |
| <i>Siderophore</i>                 | -0.374 | -0.317 | 0.384  | 0.366  | -0.198 | 0.137  | 0.625  | 0.173  |
| <i>Fimbria</i>                     | -0.381 | 0.194  | 0.363  | -0.199 | 0.703  | 0.378  | -0.088 | -0.027 |
| <i>Toxins</i>                      | 0.477  | 0.062  | -0.189 | -0.204 | 0.439  | -0.124 | 0.660  | 0.216  |
| <i>Flagellar</i>                   | 0.157  | 0.513  | 0.125  | 0.773  | 0.207  | -0.219 | -0.041 | -0.074 |
| <b>Percent Variation Explained</b> | 43.111 | 20.206 | 16.048 | 9.094  | 4.800  | 4.429  | 1.404  | 0.907  |
