# Supplementary material for: Serratia marcescens Outbreak at a Correctional Facility: Environmental Sampling, Laboratory Analyses and Genomic Characterization to Assess Sources and Persistence
Source: MDPI journal article supplement (doi:10.3390/ijerph20176709), 2023-09-04
Supplement: s1 [file s1]

**Figure S2.** Distance matrix (pairwise comparison). Value in intersection shows the number of SNPs distance between two isolates. Page 1 of 3.

More similar  More different

|             |    | 1      | 2      | 3      | 4      | 5      | 6      | 7      | 8      | 9      | 10     | 11     | 12     | 13     | 14     | 15     | 16     | 17     | 18     | 19     | 20     |
|-------------|----|--------|--------|--------|--------|--------|--------|--------|--------|--------|--------|--------|--------|--------|--------|--------|--------|--------|--------|--------|--------|
| Patient 5   | 1  |        | 0      | 0      | 0      | 0      | 0      | 0      | 0      | 0      | 0      | 0      | 0      | 0      | 0      | 0      | 0      | 0      | 0      | 0      | 0      |
| Patient 1   | 2  | 132590 |        | 0      | 0      | 0      | 0      | 0      | 0      | 0      | 0      | 0      | 0      | 0      | 0      | 0      | 0      | 0      | 0      | 0      | 0      |
| Patient 4   | 3  | 132594 | 6      |        | 0      | 0      | 0      | 0      | 0      | 0      | 0      | 0      | 0      | 0      | 0      | 0      | 0      | 0      | 0      | 0      | 0      |
| Sample A-1  | 4  | 133680 | 25098  | 25102  |        | 0      | 0      | 0      | 0      | 0      | 0      | 0      | 0      | 0      | 0      | 0      | 0      | 0      | 0      | 0      | 0      |
| Sample A-2  | 5  | 133680 | 25098  | 25102  | 2      |        | 0      | 0      | 0      | 0      | 0      | 0      | 0      | 0      | 0      | 0      | 0      | 0      | 0      | 0      | 0      |
| Sample A-3  | 6  | 135197 | 25161  | 25165  | 25805  | 25805  |        | 0      | 0      | 0      | 0      | 0      | 0      | 0      | 0      | 0      | 0      | 0      | 0      | 0      | 0      |
| Patient 8   | 7  | 178248 | 174564 | 174568 | 176080 | 176080 | 176141 |        | 0      | 0      | 0      | 0      | 0      | 0      | 0      | 0      | 0      | 0      | 0      | 0      | 0      |
| Patient 17  | 8  | 134427 | 27171  | 27175  | 15989  | 15989  | 27266  | 176777 |        | 0      | 0      | 0      | 0      | 0      | 0      | 0      | 0      | 0      | 0      | 0      | 0      |
| Patient 7-1 | 9  | 208544 | 193038 | 193042 | 194966 | 194966 | 195145 | 183026 | 195701 |        | 0      | 0      | 0      | 0      | 0      | 0      | 0      | 0      | 0      | 0      | 0      |
| Patient 7-2 | 10 | 208544 | 193042 | 193046 | 194970 | 194970 | 195145 | 183028 | 195707 | 28     |        | 0      | 0      | 0      | 0      | 0      | 0      | 0      | 0      | 0      | 0      |
| Patient 7-3 | 11 | 208540 | 193032 | 193036 | 194960 | 194960 | 195139 | 183026 | 195697 | 10     | 28     |        | 0      | 0      | 0      | 0      | 0      | 0      | 0      | 0      | 0      |
| Patient 7-4 | 12 | 208546 | 193040 | 193044 | 194968 | 194968 | 195145 | 183026 | 195705 | 20     | 32     | 22     |        | 0      | 0      | 0      | 0      | 0      | 0      | 0      | 0      |
| Sample U    | 13 | 50523  | 136421 | 136425 | 137511 | 137511 | 138706 | 180459 | 137980 | 211035 | 211029 | 211031 | 211037 |        | 0      | 0      | 0      | 0      | 0      | 0      | 0      |
| Sample O    | 14 | 135885 | 30573  | 30577  | 19403  | 19403  | 31234  | 174529 | 21420  | 194997 | 195001 | 194991 | 194999 | 139728 |        | 0      | 0      | 0      | 0      | 0      | 0      |
| Sample P    | 15 | 135886 | 30574  | 30578  | 19404  | 19404  | 31233  | 174530 | 21421  | 194998 | 195002 | 194992 | 195000 | 139729 | 1      |        | 0      | 0      | 0      | 0      | 0      |
| Patient 2-1 | 16 | 132590 | 2      | 4      | 25098  | 25098  | 25161  | 174564 | 27171  | 193038 | 193042 | 193032 | 193040 | 136421 | 30573  | 30574  |        | 0      | 0      | 0      | 0      |
| Sample V    | 17 | 46943  | 135317 | 135321 | 136363 | 136363 | 137750 | 178405 | 137466 | 207689 | 207685 | 207685 | 207683 | 44334  | 138496 | 138497 | 135317 |        | 0      | 0      | 0      |
| Sample M-1  | 18 | 134662 | 26992  | 26996  | 13552  | 13552  | 27045  | 176830 | 17417  | 195668 | 195672 | 195662 | 195670 | 138403 | 20855  | 20856  | 26992  | 137063 |        | 0      | 0      |
| Sample M-2  | 19 | 135125 | 26579  | 26583  | 27857  | 27857  | 26136  | 176967 | 29586  | 195231 | 195235 | 195225 | 195229 | 138940 | 32652  | 32651  | 26579  | 137782 | 29141  |        | 0      |
| Sample D-1  | 20 | 134421 | 26905  | 26909  | 15649  | 15649  | 26890  | 176534 | 17341  | 195676 | 195680 | 195670 | 195678 | 138121 | 20363  | 20364  | 26720  | 137163 | 16584  | 29191  | 17045  |
| Sample D-2  | 21 | 134434 | 26720  | 26724  | 14700  | 14700  | 27057  | 176534 | 17341  | 195676 | 195680 | 195670 | 195678 | 138121 | 20363  | 20364  | 26720  | 137163 | 16584  | 29191  | 17045  |
| Sample 2-2  | 22 | 132591 | 1      | 5      | 25099  | 25099  | 25160  | 174565 | 27172  | 193039 | 193043 | 193033 | 193041 | 136422 | 30574  | 30575  | 1      | 135318 | 26993  | 26578  | 26906  |
| Patient 2-3 | 23 | 132589 | 1      | 5      | 25097  | 25097  | 25162  | 174563 | 27170  | 193037 | 193041 | 193031 | 193039 | 136420 | 30572  | 30573  | 1      | 135316 | 26991  | 26580  | 26904  |
| Sample E-1  | 24 | 171834 | 170316 | 170320 | 171676 | 171676 | 172345 | 122992 | 172815 | 180206 | 180192 | 180202 | 180208 | 173795 | 171679 | 171680 | 170316 | 171967 | 172632 | 172581 | 172475 |
| Sample E-2  | 25 | 171834 | 170314 | 170316 | 171676 | 171676 | 172339 | 122984 | 172813 | 180212 | 180200 | 180210 | 180216 | 173795 | 171677 | 171678 | 170312 | 171965 | 172632 | 172579 | 172473 |
| Sample I-1  | 26 | 132589 | 1      | 5      | 25097  | 25097  | 25162  | 174563 | 27170  | 193037 | 193041 | 193031 | 193039 | 136420 | 30572  | 30573  | 1      | 135316 | 26991  | 26580  | 26904  |
| Sample I-2  | 27 | 132590 | 0      | 6      | 25098  | 25098  | 25161  | 174564 | 27171  | 193038 | 193042 | 193032 | 193040 | 136421 | 30573  | 30574  | 2      | 135317 | 26992  | 26579  | 26905  |
| Sample I-3  | 28 | 132589 | 1      | 7      | 25097  | 25097  | 25160  | 174563 | 27170  | 193037 | 193041 | 193031 | 193039 | 136420 | 30572  | 30573  | 3      | 135316 | 26991  | 26578  | 26904  |
| Sample I-4  | 29 | 132589 | 1      | 5      | 25097  | 25097  | 25162  | 174563 | 27170  | 193037 | 193041 | 193031 | 193039 | 136420 | 30572  | 30573  | 1      | 135316 | 26991  | 26580  | 26904  |
| Sample F    | 30 | 134986 | 24898  | 24902  | 25558  | 25558  | 845    | 176380 | 27171  | 194974 | 194974 | 194968 | 194974 | 138463 | 13131  | 13130  | 24898  | 137545 | 26740  | 25879  | 26731  |
| Sample I-5  | 31 | 171839 | 170307 | 170309 | 171669 | 171669 | 172334 | 122983 | 172806 | 180205 | 180191 | 180201 | 180207 | 173796 | 171666 | 171667 | 170305 | 171970 | 172625 | 172572 | 172466 |
| Sample N    | 32 | 135292 | 25252  | 25256  | 25910  | 25910  | 363    | 176228 | 27451  | 195232 | 195232 | 195226 | 195232 | 138787 | 31327  | 31326  | 25252  | 137845 | 27098  | 26245  | 27045  |
| Sample Q    | 33 | 135931 | 30621  | 30623  | 19451  | 19451  | 31192  | 174575 | 21382  | 195045 | 195049 | 195039 | 195047 | 139774 | 56     | 55     | 30619  | 138544 | 20903  | 32694  | 21112  |
| Patient 18  | 34 | 35157  | 133573 | 133577 | 134747 | 134747 | 136114 | 178841 | 135668 | 209153 | 209145 | 209151 | 209151 | 49342  | 136886 | 136887 | 133573 | 44930  | 135439 | 136188 | 135336 |
| Patient 3-1 | 35 | 132589 | 1      | 5      | 25097  | 25097  | 25162  | 174563 | 27170  | 193037 | 193041 | 193031 | 193039 | 136420 | 30572  | 30573  | 1      | 135316 | 26991  | 26580  | 26904  |
| Patient 3-2 | 36 | 132589 | 1      | 5      | 25097  | 25097  | 25162  | 174563 | 27170  | 193037 | 193041 | 193031 | 193039 | 136420 | 30572  | 30573  | 1      | 135316 | 26991  | 26580  | 26904  |
| Sample H    | 37 | 15     | 132587 | 132591 | 133677 | 133677 | 135194 | 178243 | 134424 | 208543 | 208543 | 208539 | 208545 | 50518  | 135882 | 135883 | 132587 | 46938  | 134659 | 135122 | 134418 |
| Sample B    | 38 | 14     | 132588 | 132592 | 133678 | 133678 | 135195 | 178242 | 134425 | 208544 | 208544 | 208540 | 208546 | 50519  | 135883 | 135884 | 132588 | 46939  | 134660 | 135123 | 134419 |
| Sample C    | 39 | 132589 | 1      | 5      | 25097  | 25097  | 25162  | 174563 | 27170  | 193037 | 193041 | 193031 | 193039 | 136420 | 30572  | 30573  | 1      | 135316 | 26991  | 26580  | 26904  |
| Patient 15  | 40 | 132590 | 2      | 6      | 25098  | 25098  | 25163  | 174564 | 27171  | 193038 | 193042 | 193032 | 193040 | 136421 | 30573  | 30574  | 2      | 135317 | 26992  | 26579  | 26905  |
| Patient 6   | 41 | 209670 | 194334 | 194338 | 196302 | 196302 | 186068 | 196589 | 52038  | 52036  | 52038  | 52036  | 52036  | 210963 | 196361 | 196362 | 194334 | 208587 | 196706 | 196269 | 196273 |
| Sample W    | 42 | 48332  | 135180 | 135184 | 136204 | 136204 | 137483 | 179526 | 136909 | 209348 | 209348 | 209346 | 209346 | 34217  | 138435 | 138436 | 135180 | 41997  | 137206 | 137711 | 136925 |
| Sample Y    | 43 | 15     | 132595 | 132599 | 133687 | 133687 | 135204 | 178251 | 134434 | 208551 | 208551 | 208547 | 208553 | 50520  | 135892 | 135893 | 132595 | 46944  | 134669 | 135132 | 134428 |
| Sample G    | 44 | 31199  | 132685 | 132689 | 133659 | 133659 | 135214 | 177907 | 134678 | 208299 | 208293 | 208297 | 208299 | 49566  | 135814 | 135815 | 132685 | 45126  | 134455 | 135172 | 134342 |
| Sample R    | 45 | 135992 | 30670  | 30672  | 19662  | 19662  | 31199  | 174716 | 21617  | 195228 | 195232 | 195222 | 195230 | 139831 | 665    | 666    | 30668  | 138599 | 20906  | 32727  | 21363  |
| Sample Z    | 46 | 209658 | 194320 | 194324 | 196288 | 196288 | 186060 | 196579 | 52044  | 52044  | 52044  | 52044  | 52044  | 210951 | 196347 | 196348 | 194320 | 208575 | 196702 | 196263 | 196263 |
| Sample S    | 47 | 135962 | 30656  | 30660  | 19486  | 19486  | 31241  | 174604 | 21437  | 195082 | 195086 | 195076 | 195084 | 139805 | 131    | 130    | 30656  | 138581 | 20936  | 32729  | 21155  |
| Sample T    | 48 | 135991 | 30669  | 30671  | 19661  | 19661  | 31196  | 174715 | 21616  | 195231 | 195235 | 195225 | 195233 | 139832 | 668    | 667    | 30667  | 138598 | 20905  | 32724  | 21360  |
| Sample AB   | 49 | 134385 | 26673  | 26677  | 14657  | 14657  | 26928  | 176505 | 17340  | 195633 | 195637 | 195627 | 195635 | 138234 | 20320  | 20321  | 26673  | 137122 | 16547  | 28926  | 16998  |
| Sample J    | 50 | 50243  | 136077 | 136081 | 137191 | 137191 | 138364 | 180133 | 137668 | 210709 | 210703 | 210705 | 210709 | 422    | 139384 | 139385 | 136077 | 44002  | 138083 | 138616 | 137688 |
| Sample AA   | 51 | 50240  | 136076 | 136078 | 137188 | 137188 | 138361 | 180130 | 137665 | 210708 | 210706 | 210704 | 210708 | 425    | 139383 | 139384 | 136074 | 44003  | 138082 | 138613 | 137685 |
| Sample K    | 52 | 50245  | 136073 | 136077 | 137185 | 137185 | 138360 | 180129 | 137662 | 210707 | 210701 | 210703 | 210707 | 418    | 139380 | 139381 | 136073 | 44004  | 138079 | 138612 | 137682 |
| Sample L    | 53 | 135886 | 30574  | 30576  | 19406  | 19406  | 31229  | 174534 | 21423  | 195000 | 195004 | 194994 | 195002 | 139729 | 5      | 4      | 30572  | 138497 | 20858  | 32647  | 21115  |
| Patient 9   | 54 | 132592 | 2      | 8      | 25100  | 25098  | 25161  | 174566 | 27171  | 193040 | 193044 | 193034 | 193042 | 136423 | 30575  | 30576  | 4      | 135319 | 26994  | 26579  | 26905  |
| Patient 10  | 55 | 132592 | 4      | 6      | 25098  | 25098  | 25159  | 174566 | 27169  | 193040 | 193044 | 193034 | 193042 | 136423 | 30575  | 30576  | 2      | 135319 | 26994  | 26577  | 26903  |
| Patient 11  | 56 | 132575 | 19     | 25     | 25083  | 25081  | 25144  | 174547 | 27154  | 193023 | 193027 | 193017 | 193025 | 136406 | 30558  | 30559  | 21     | 135302 | 26977  | 26562  | 26888  |
| Patient 14  | 57 | 134681 | 27009  | 27013  | 13557  | 13557  | 27048  | 176843 | 17418  | 195683 | 195687 | 195677 | 195685 | 138420 | 20866  | 20867  | 27009  | 137082 | 39     | 29148  | 17084  |
| Patient 13  | 58 | 132594 | 4      |        |        |        |        |        |        |        |        |        |        |        |        |        |        |        |        |        |        |



Figure S2 Continued. Page 2 of 3.

|             | 21 | 22     | 23     | 24     | 25     | 26     | 27     | 28     | 29     | 30     | 31     | 32     | 33     | 34     | 35     | 36     | 37     | 38     | 39     | 40     |
|-------------|----|--------|--------|--------|--------|--------|--------|--------|--------|--------|--------|--------|--------|--------|--------|--------|--------|--------|--------|--------|
| Patient 5   | 1  | 0      | 0      | 0      | 0      | 0      | 0      | 0      | 0      | 0      | 0      | 0      | 0      | 0      | 0      | 0      | 0      | 0      | 0      | 0      |
| Patient 1   | 2  | 0      | 0      | 0      | 0      | 0      | 0      | 0      | 0      | 0      | 0      | 0      | 0      | 0      | 0      | 0      | 0      | 0      | 0      | 0      |
| Patient 4   | 3  | 0      | 0      | 0      | 0      | 0      | 0      | 0      | 0      | 0      | 0      | 0      | 0      | 0      | 0      | 0      | 0      | 0      | 0      | 0      |
| Sample A-1  | 4  | 0      | 0      | 0      | 0      | 0      | 0      | 0      | 0      | 0      | 0      | 0      | 0      | 0      | 0      | 0      | 0      | 0      | 0      | 0      |
| Sample A-2  | 5  | 0      | 0      | 0      | 0      | 0      | 0      | 0      | 0      | 0      | 0      | 0      | 0      | 0      | 0      | 0      | 0      | 0      | 0      | 0      |
| Sample A-3  | 6  | 0      | 0      | 0      | 0      | 0      | 0      | 0      | 0      | 0      | 0      | 0      | 0      | 0      | 0      | 0      | 0      | 0      | 0      | 0      |
| Patient 8   | 7  | 0      | 0      | 0      | 0      | 0      | 0      | 0      | 0      | 0      | 0      | 0      | 0      | 0      | 0      | 0      | 0      | 0      | 0      | 0      |
| Patient 17  | 8  | 0      | 0      | 0      | 0      | 0      | 0      | 0      | 0      | 0      | 0      | 0      | 0      | 0      | 0      | 0      | 0      | 0      | 0      | 0      |
| Patient 7-1 | 9  | 0      | 0      | 0      | 0      | 0      | 0      | 0      | 0      | 0      | 0      | 0      | 0      | 0      | 0      | 0      | 0      | 0      | 0      | 0      |
| Patient 7-2 | 10 | 0      | 0      | 0      | 0      | 0      | 0      | 0      | 0      | 0      | 0      | 0      | 0      | 0      | 0      | 0      | 0      | 0      | 0      | 0      |
| Patient 7-3 | 11 | 0      | 0      | 0      | 0      | 0      | 0      | 0      | 0      | 0      | 0      | 0      | 0      | 0      | 0      | 0      | 0      | 0      | 0      | 0      |
| Patient 7-4 | 12 | 0      | 0      | 0      | 0      | 0      | 0      | 0      | 0      | 0      | 0      | 0      | 0      | 0      | 0      | 0      | 0      | 0      | 0      | 0      |
| Sample U    | 13 | 0      | 0      | 0      | 0      | 0      | 0      | 0      | 0      | 0      | 0      | 0      | 0      | 0      | 0      | 0      | 0      | 0      | 0      | 0      |
| Sample O    | 14 | 0      | 0      | 0      | 0      | 0      | 0      | 0      | 0      | 0      | 0      | 0      | 0      | 0      | 0      | 0      | 0      | 0      | 0      | 0      |
| Sample P    | 15 | 0      | 0      | 0      | 0      | 0      | 0      | 0      | 0      | 0      | 0      | 0      | 0      | 0      | 0      | 0      | 0      | 0      | 0      | 0      |
| Patient 2-1 | 16 | 0      | 0      | 0      | 0      | 0      | 0      | 0      | 0      | 0      | 0      | 0      | 0      | 0      | 0      | 0      | 0      | 0      | 0      | 0      |
| Sample V    | 17 | 0      | 0      | 0      | 0      | 0      | 0      | 0      | 0      | 0      | 0      | 0      | 0      | 0      | 0      | 0      | 0      | 0      | 0      | 0      |
| Sample M-1  | 18 | 0      | 0      | 0      | 0      | 0      | 0      | 0      | 0      | 0      | 0      | 0      | 0      | 0      | 0      | 0      | 0      | 0      | 0      | 0      |
| Sample M-2  | 19 | 0      | 0      | 0      | 0      | 0      | 0      | 0      | 0      | 0      | 0      | 0      | 0      | 0      | 0      | 0      | 0      | 0      | 0      | 0      |
| Sample D-1  | 20 | 0      | 0      | 0      | 0      | 0      | 0      | 0      | 0      | 0      | 0      | 0      | 0      | 0      | 0      | 0      | 0      | 0      | 0      | 0      |
| Sample D-2  | 21 |        | 0      | 0      | 0      | 0      | 0      | 0      | 0      | 0      | 0      | 0      | 0      | 0      | 0      | 0      | 0      | 0      | 0      | 0      |
| Patient 2-2 | 22 | 26721  |        | 0      | 0      | 0      | 0      | 0      | 0      | 0      | 0      | 0      | 0      | 0      | 0      | 0      | 0      | 0      | 0      | 0      |
| Patient 2-3 | 23 | 26719  | 2      |        | 0      | 0      | 0      | 0      | 0      | 0      | 0      | 0      | 0      | 0      | 0      | 0      | 0      | 0      | 0      | 0      |
| Sample E-1  | 24 | 172358 | 170317 | 170315 |        | 0      | 0      | 0      | 0      | 0      | 0      | 0      | 0      | 0      | 0      | 0      | 0      | 0      | 0      | 0      |
| Sample E-2  | 25 | 172356 | 170313 | 170313 | 16     |        | 0      | 0      | 0      | 0      | 0      | 0      | 0      | 0      | 0      | 0      | 0      | 0      | 0      | 0      |
| Sample I-1  | 26 | 26719  | 2      | 0      | 170315 | 170313 |        | 0      | 0      | 0      | 0      | 0      | 0      | 0      | 0      | 0      | 0      | 0      | 0      | 0      |
| Sample I-2  | 27 | 26720  | 1      | 1      | 170316 | 170314 | 1      |        | 0      | 0      | 0      | 0      | 0      | 0      | 0      | 0      | 0      | 0      | 0      | 0      |
| Sample I-3  | 28 | 26719  | 2      | 2      | 170315 | 170313 | 2      | 1      |        | 0      | 0      | 0      | 0      | 0      | 0      | 0      | 0      | 0      | 0      | 0      |
| Sample I-4  | 29 | 26719  | 2      | 0      | 170315 | 170313 | 0      | 1      | 2      |        | 0      | 0      | 0      | 0      | 0      | 0      | 0      | 0      | 0      | 0      |
| Sample F    | 30 | 26818  | 24897  | 24899  | 172128 | 172122 | 24899  | 24898  | 24897  | 24899  |        | 0      | 0      | 0      | 0      | 0      | 0      | 0      | 0      | 0      |
| Sample I-5  | 31 | 172349 | 170306 | 170306 | 19     | 13     | 170306 | 170307 | 170306 | 170306 | 172117 |        | 0      | 0      | 0      | 0      | 0      | 0      | 0      | 0      |
| Sample N    | 32 | 27182  | 25251  | 25253  | 172432 | 172426 | 25253  | 25252  | 25251  | 25253  | 858    | 172421 |        | 0      | 0      | 0      | 0      | 0      | 0      | 0      |
| Sample Q    | 33 | 20411  | 30620  | 30620  | 171725 | 171721 | 30620  | 30621  | 30620  | 30620  | 31355  | 171710 | 31371  |        | 0      | 0      | 0      | 0      | 0      | 0      |
| Patient 18  | 34 | 135391 | 133574 | 133572 | 172199 | 172201 | 133572 | 133573 | 133572 | 133572 | 135903 | 172206 | 136207 | 136934 |        | 0      | 0      | 0      | 0      | 0      |
| Patient 3-1 | 35 | 26719  | 2      | 0      | 170315 | 170313 | 0      | 1      | 2      | 0      | 24899  | 170306 | 25253  | 30620  | 133572 |        | 0      | 0      | 0      | 0      |
| Patient 3-2 | 36 | 26719  | 2      | 0      | 170315 | 170313 | 0      | 1      | 2      | 0      | 24899  | 170306 | 25253  | 30620  | 133572 | 0      |        | 0      | 0      | 0      |
| Sample H    | 37 | 134431 | 132588 | 132586 | 171835 | 171835 | 132586 | 132587 | 132586 | 132586 | 134983 | 171840 | 135289 | 135928 | 35152  | 132586 | 132586 |        | 0      | 0      |
| Sample B    | 38 | 134432 | 132589 | 132587 | 171840 | 171840 | 132587 | 132588 | 132587 | 132587 | 134984 | 171845 | 135290 | 135929 | 35155  | 132587 | 132587 | 11     |        | 0      |
| Sample C    | 39 | 26719  | 2      | 0      | 170315 | 170313 | 0      | 1      | 2      | 0      | 24899  | 170306 | 25253  | 30620  | 133572 | 0      | 0      | 132586 | 132587 | 0      |
| Patient 15  | 40 | 26720  | 3      | 1      | 170316 | 170314 | 1      | 2      | 3      | 1      | 24900  | 170307 | 25254  | 30621  | 133573 | 1      | 1      | 132587 | 132588 | 1      |
| Patient 6   | 41 | 196946 | 194335 | 194333 | 184816 | 184818 | 194333 | 194334 | 194333 | 194333 | 196036 | 184809 | 196290 | 196409 | 210553 | 194333 | 194333 | 209669 | 209670 | 194333 |
| Sample W    | 42 | 137046 | 135181 | 135179 | 172496 | 172496 | 135179 | 135180 | 135179 | 135179 | 137278 | 172499 | 137578 | 138481 | 47995  | 135179 | 135179 | 48329  | 48328  | 135179 |
| Sample Y    | 43 | 134441 | 132596 | 132594 | 171845 | 171845 | 132594 | 132595 | 132594 | 132594 | 134993 | 171850 | 135299 | 135938 | 35158  | 132594 | 132594 | 14     | 11     | 132594 |
| Sample G    | 44 | 134243 | 132686 | 132684 | 171435 | 171431 | 132684 | 132685 | 132684 | 132684 | 135003 | 171436 | 135309 | 135860 | 31098  | 132684 | 132684 | 31192  | 31193  | 132684 |
| Sample R    | 45 | 20268  | 30669  | 30669  | 171690 | 171686 | 30669  | 30670  | 30669  | 30669  | 31278  | 171675 | 31298  | 713    | 136987 | 30669  | 30669  | 135989 | 135990 | 30669  |
| Sample Z    | 46 | 196932 | 194321 | 194319 | 184814 | 184816 | 194319 | 194320 | 194319 | 194319 | 196028 | 184807 | 196282 | 196395 | 210541 | 194319 | 194319 | 209657 | 209658 | 194319 |
| Sample S    | 47 | 20442  | 30657  | 30655  | 171764 | 171762 | 30655  | 30656  | 30655  | 30655  | 31380  | 171751 | 31408  | 111    | 136971 | 30655  | 30655  | 135959 | 135960 | 30655  |
| Sample T    | 48 | 20267  | 30668  | 30668  | 171689 | 171685 | 30668  | 30669  | 30668  | 30668  | 31275  | 171678 | 31295  | 714    | 136986 | 30668  | 30668  | 135988 | 135989 | 30668  |
| Sample AB   | 49 | 531    | 26674  | 26672  | 172313 | 172311 | 26672  | 26673  | 26672  | 26672  | 26767  | 172304 | 27129  | 20286  | 135484 | 26672  | 26672  | 134382 | 134383 | 26672  |
| Sample J    | 50 | 137785 | 136078 | 136076 | 173467 | 173467 | 136076 | 136077 | 136076 | 136076 | 138121 | 173468 | 138445 | 139430 | 49022  | 136076 | 136076 | 50240  | 50243  | 136076 |
| Sample AA   | 51 | 137782 | 136075 | 136075 | 173466 | 173464 | 136075 | 136076 | 136075 | 136075 | 138118 | 173465 | 138442 | 139427 | 49027  | 136075 | 136075 | 50237  | 50238  | 136075 |
| Sample K    | 52 | 137779 | 136074 | 136072 | 173463 | 173463 | 136072 | 136073 | 136072 | 136072 | 138117 | 173464 | 138441 | 139426 | 49022  | 136072 | 136072 | 50240  | 50243  | 136072 |
| Sample L    | 53 | 20366  | 30573  | 30573  | 171680 | 171676 | 30573  | 30574  | 30573  | 30573  | 31306  | 171665 | 31322  | 57     | 136887 | 30573  | 30573  | 135883 | 135884 | 30573  |
| Patient 9   | 54 | 26722  | 3      | 3      | 170318 | 170316 | 3      | 2      | 3      | 3      | 24898  | 170309 | 25252  | 30623  | 133575 | 3      | 3      | 132589 | 132590 | 3      |
| Patient 10  | 55 | 26722  | 3      | 3      | 170318 | 170314 | 3      | 4      | 5      | 3      | 24896  | 170307 | 25250  | 30621  | 133575 | 3      | 3      | 132589 | 132590 | 3      |
| Patient 11  | 56 | 26705  | 20     | 20     | 170301 | 170299 | 20     | 19     | 20     | 20     | 24881  | 170292 | 25235  | 30606  | 133558 | 20     | 20     | 132572 | 132573 | 20     |
| Patient 14  | 57 | 16593  | 27010  | 27008  | 172649 | 172649 | 27008  | 27009  | 27008  | 27008  | 26743  | 172642 | 27101  | 20914  | 135456 | 27008  | 27008  | 134678 | 134679 | 27008  |
| Patient 13  | 58 | 26724  | 5      | 5      | 170320 | 170318 | 5      | 4      | 5      | 5      | 24898  | 170311 | 25252  | 30625  | 133577 | 5      | 5      | 132591 | 132592 | 5      |
| Patient 16  | 59 | 177365 | 175284 | 175284 | 120207 | 120199 | 175284 | 175285 | 175284 | 175284 | 176683 | 120198 | 176999 | 175388 | 178666 | 175284 | 175284 | 177824 | 177825 | 175284 |
| Patient 12  | 60 | 163424 | 161125 | 161123 | 102710 | 102704 | 161123 | 161124 | 161123 | 161123 | 162656 | 102705 | 162958 | 161551 | 163559 | 161123 | 161123 | 162797 | 162802 | 161123 |



Figure S2 Continued. Page 3 of 3.

|             |    | 41     | 42     | 43     | 44     | 45     | 46     | 47     | 48     | 49     | 50     | 51     | 52     | 53     | 54     | 55     | 56     | 57     | 58     | 59    | 60 |
|-------------|----|--------|--------|--------|--------|--------|--------|--------|--------|--------|--------|--------|--------|--------|--------|--------|--------|--------|--------|-------|----|
| Patient 5   | 1  | 0      | 0      | 0      | 0      | 0      | 0      | 0      | 0      | 0      | 0      | 0      | 0      | 0      | 0      | 0      | 0      | 0      | 0      | 0     | 0  |
| Patient 1   | 2  | 0      | 0      | 0      | 0      | 0      | 0      | 0      | 0      | 0      | 0      | 0      | 0      | 0      | 0      | 0      | 0      | 0      | 0      | 0     | 0  |
| Patient 4   | 3  | 0      | 0      | 0      | 0      | 0      | 0      | 0      | 0      | 0      | 0      | 0      | 0      | 0      | 0      | 0      | 0      | 0      | 0      | 0     | 0  |
| Sample A-1  | 4  | 0      | 0      | 0      | 0      | 0      | 0      | 0      | 0      | 0      | 0      | 0      | 0      | 0      | 0      | 0      | 0      | 0      | 0      | 0     | 0  |
| Sample A-2  | 5  | 0      | 0      | 0      | 0      | 0      | 0      | 0      | 0      | 0      | 0      | 0      | 0      | 0      | 0      | 0      | 0      | 0      | 0      | 0     | 0  |
| Sample A-3  | 6  | 0      | 0      | 0      | 0      | 0      | 0      | 0      | 0      | 0      | 0      | 0      | 0      | 0      | 0      | 0      | 0      | 0      | 0      | 0     | 0  |
| Patient 8   | 7  | 0      | 0      | 0      | 0      | 0      | 0      | 0      | 0      | 0      | 0      | 0      | 0      | 0      | 0      | 0      | 0      | 0      | 0      | 0     | 0  |
| Patient 17  | 8  | 0      | 0      | 0      | 0      | 0      | 0      | 0      | 0      | 0      | 0      | 0      | 0      | 0      | 0      | 0      | 0      | 0      | 0      | 0     | 0  |
| Patient 7-1 | 9  | 0      | 0      | 0      | 0      | 0      | 0      | 0      | 0      | 0      | 0      | 0      | 0      | 0      | 0      | 0      | 0      | 0      | 0      | 0     | 0  |
| Patient 7-2 | 10 | 0      | 0      | 0      | 0      | 0      | 0      | 0      | 0      | 0      | 0      | 0      | 0      | 0      | 0      | 0      | 0      | 0      | 0      | 0     | 0  |
| Patient 7-3 | 11 | 0      | 0      | 0      | 0      | 0      | 0      | 0      | 0      | 0      | 0      | 0      | 0      | 0      | 0      | 0      | 0      | 0      | 0      | 0     | 0  |
| Patient 7-4 | 12 | 0      | 0      | 0      | 0      | 0      | 0      | 0      | 0      | 0      | 0      | 0      | 0      | 0      | 0      | 0      | 0      | 0      | 0      | 0     | 0  |
| Sample U    | 13 | 0      | 0      | 0      | 0      | 0      | 0      | 0      | 0      | 0      | 0      | 0      | 0      | 0      | 0      | 0      | 0      | 0      | 0      | 0     | 0  |
| Sample O    | 14 | 0      | 0      | 0      | 0      | 0      | 0      | 0      | 0      | 0      | 0      | 0      | 0      | 0      | 0      | 0      | 0      | 0      | 0      | 0     | 0  |
| Sample P    | 15 | 0      | 0      | 0      | 0      | 0      | 0      | 0      | 0      | 0      | 0      | 0      | 0      | 0      | 0      | 0      | 0      | 0      | 0      | 0     | 0  |
| Patient 2-1 | 16 | 0      | 0      | 0      | 0      | 0      | 0      | 0      | 0      | 0      | 0      | 0      | 0      | 0      | 0      | 0      | 0      | 0      | 0      | 0     | 0  |
| Sample V    | 17 | 0      | 0      | 0      | 0      | 0      | 0      | 0      | 0      | 0      | 0      | 0      | 0      | 0      | 0      | 0      | 0      | 0      | 0      | 0     | 0  |
| Sample M-1  | 18 | 0      | 0      | 0      | 0      | 0      | 0      | 0      | 0      | 0      | 0      | 0      | 0      | 0      | 0      | 0      | 0      | 0      | 0      | 0     | 0  |
| Sample M-2  | 19 | 0      | 0      | 0      | 0      | 0      | 0      | 0      | 0      | 0      | 0      | 0      | 0      | 0      | 0      | 0      | 0      | 0      | 0      | 0     | 0  |
| Sample D-1  | 20 | 0      | 0      | 0      | 0      | 0      | 0      | 0      | 0      | 0      | 0      | 0      | 0      | 0      | 0      | 0      | 0      | 0      | 0      | 0     | 0  |
| Sample D-2  | 21 | 0      | 0      | 0      | 0      | 0      | 0      | 0      | 0      | 0      | 0      | 0      | 0      | 0      | 0      | 0      | 0      | 0      | 0      | 0     | 0  |
| Patient 2-2 | 22 | 0      | 0      | 0      | 0      | 0      | 0      | 0      | 0      | 0      | 0      | 0      | 0      | 0      | 0      | 0      | 0      | 0      | 0      | 0     | 0  |
| Patient 2-3 | 23 | 0      | 0      | 0      | 0      | 0      | 0      | 0      | 0      | 0      | 0      | 0      | 0      | 0      | 0      | 0      | 0      | 0      | 0      | 0     | 0  |
| Sample E-1  | 24 | 0      | 0      | 0      | 0      | 0      | 0      | 0      | 0      | 0      | 0      | 0      | 0      | 0      | 0      | 0      | 0      | 0      | 0      | 0     | 0  |
| Sample E-2  | 25 | 0      | 0      | 0      | 0      | 0      | 0      | 0      | 0      | 0      | 0      | 0      | 0      | 0      | 0      | 0      | 0      | 0      | 0      | 0     | 0  |
| Sample I-1  | 26 | 0      | 0      | 0      | 0      | 0      | 0      | 0      | 0      | 0      | 0      | 0      | 0      | 0      | 0      | 0      | 0      | 0      | 0      | 0     | 0  |
| Sample I-2  | 27 | 0      | 0      | 0      | 0      | 0      | 0      | 0      | 0      | 0      | 0      | 0      | 0      | 0      | 0      | 0      | 0      | 0      | 0      | 0     | 0  |
| Sample I-3  | 28 | 0      | 0      | 0      | 0      | 0      | 0      | 0      | 0      | 0      | 0      | 0      | 0      | 0      | 0      | 0      | 0      | 0      | 0      | 0     | 0  |
| Sample I-4  | 29 | 0      | 0      | 0      | 0      | 0      | 0      | 0      | 0      | 0      | 0      | 0      | 0      | 0      | 0      | 0      | 0      | 0      | 0      | 0     | 0  |
| Sample F    | 30 | 0      | 0      | 0      | 0      | 0      | 0      | 0      | 0      | 0      | 0      | 0      | 0      | 0      | 0      | 0      | 0      | 0      | 0      | 0     | 0  |
| Sample I-5  | 31 | 0      | 0      | 0      | 0      | 0      | 0      | 0      | 0      | 0      | 0      | 0      | 0      | 0      | 0      | 0      | 0      | 0      | 0      | 0     | 0  |
| Sample N    | 32 | 0      | 0      | 0      | 0      | 0      | 0      | 0      | 0      | 0      | 0      | 0      | 0      | 0      | 0      | 0      | 0      | 0      | 0      | 0     | 0  |
| Sample Q    | 33 | 0      | 0      | 0      | 0      | 0      | 0      | 0      | 0      | 0      | 0      | 0      | 0      | 0      | 0      | 0      | 0      | 0      | 0      | 0     | 0  |
| Patient 18  | 34 | 0      | 0      | 0      | 0      | 0      | 0      | 0      | 0      | 0      | 0      | 0      | 0      | 0      | 0      | 0      | 0      | 0      | 0      | 0     | 0  |
| Patient 3-1 | 35 | 0      | 0      | 0      | 0      | 0      | 0      | 0      | 0      | 0      | 0      | 0      | 0      | 0      | 0      | 0      | 0      | 0      | 0      | 0     | 0  |
| Patient 3-2 | 36 | 0      | 0      | 0      | 0      | 0      | 0      | 0      | 0      | 0      | 0      | 0      | 0      | 0      | 0      | 0      | 0      | 0      | 0      | 0     | 0  |
| Sample H    | 37 | 0      | 0      | 0      | 0      | 0      | 0      | 0      | 0      | 0      | 0      | 0      | 0      | 0      | 0      | 0      | 0      | 0      | 0      | 0     | 0  |
| Sample B    | 38 | 0      | 0      | 0      | 0      | 0      | 0      | 0      | 0      | 0      | 0      | 0      | 0      | 0      | 0      | 0      | 0      | 0      | 0      | 0     | 0  |
| Sample C    | 39 | 0      | 0      | 0      | 0      | 0      | 0      | 0      | 0      | 0      | 0      | 0      | 0      | 0      | 0      | 0      | 0      | 0      | 0      | 0     | 0  |
| Patient 15  | 40 | 0      | 0      | 0      | 0      | 0      | 0      | 0      | 0      | 0      | 0      | 0      | 0      | 0      | 0      | 0      | 0      | 0      | 0      | 0     | 0  |
| Patient 6   | 41 |        | 0      | 0      | 0      | 0      | 0      | 0      | 0      | 0      | 0      | 0      | 0      | 0      | 0      | 0      | 0      | 0      | 0      | 0     | 0  |
| Sample W    | 42 | 209960 |        | 0      | 0      | 0      | 0      | 0      | 0      | 0      | 0      | 0      | 0      | 0      | 0      | 0      | 0      | 0      | 0      | 0     | 0  |
| Sample Y    | 43 | 209677 | 48331  |        | 0      | 0      | 0      | 0      | 0      | 0      | 0      | 0      | 0      | 0      | 0      | 0      | 0      | 0      | 0      | 0     | 0  |
| Sample G    | 44 | 209525 | 48233  | 31194  |        | 0      | 0      | 0      | 0      | 0      | 0      | 0      | 0      | 0      | 0      | 0      | 0      | 0      | 0      | 0     | 0  |
| Sample R    | 45 | 196420 | 138544 | 135999 | 135913 |        | 0      | 0      | 0      | 0      | 0      | 0      | 0      | 0      | 0      | 0      | 0      | 0      | 0      | 0     | 0  |
| Sample Z    | 46 |        | 34     | 209946 | 209665 | 209515 | 196414 |        | 0      | 0      | 0      | 0      | 0      | 0      | 0      | 0      | 0      | 0      | 0      | 0     | 0  |
| Sample S    | 47 | 196446 | 138512 | 135969 | 135899 | 684    | 196432 |        | 0      | 0      | 0      | 0      | 0      | 0      | 0      | 0      | 0      | 0      | 0      | 0     | 0  |
| Sample T    | 48 | 196423 | 138543 | 135998 | 135912 | 5      | 196417 | 685    |        | 0      | 0      | 0      | 0      | 0      | 0      | 0      | 0      | 0      | 0      | 0     | 0  |
| Sample AB   | 49 | 196905 | 136991 | 134392 | 134336 | 20569  | 196891 | 20323  | 20566  |        | 0      | 0      | 0      | 0      | 0      | 0      | 0      | 0      | 0      | 0     | 0  |
| Sample J    | 50 | 210635 | 33933  | 50240  | 49270  | 139487 | 210625 | 139461 | 139488 | 137898 |        | 0      | 0      | 0      | 0      | 0      | 0      | 0      | 0      | 0     | 0  |
| Sample AA   | 51 | 210634 | 33930  | 50239  | 49275  | 139484 | 210622 | 139460 | 139485 | 137895 | 11     |        | 0      | 0      | 0      | 0      | 0      | 0      | 0      | 0     | 0  |
| Sample K    | 52 | 210635 | 33931  | 50242  | 49272  | 139483 | 210623 | 139457 | 139484 | 137892 | 8      | 13     |        | 0      | 0      | 0      | 0      | 0      | 0      | 0     | 0  |
| Sample L    | 53 | 196362 | 138436 | 135893 | 135815 | 668    | 196348 | 134    | 667    | 20321  | 139385 | 139382 | 139381 |        | 0      | 0      | 0      | 0      | 0      | 0     | 0  |
| Patient 9   | 54 | 194336 | 135182 | 132597 | 132687 | 30672  | 194322 | 30658  | 30671  | 26675  | 136079 | 136078 | 136075 | 30576  |        | 0      | 0      | 0      | 0      | 0     | 0  |
| Patient 10  | 55 | 194336 | 135182 | 132597 | 132687 | 30670  | 194322 | 30658  | 30669  | 26675  | 136079 | 136076 | 136075 | 30574  | 4      |        | 0      | 0      | 0      | 0     | 0  |
| Patient 11  | 56 | 194323 | 135165 | 132580 | 132670 | 30655  | 194309 | 30641  | 30654  | 26658  | 136062 | 136061 | 136058 | 30559  | 19     | 21     |        | 0      | 0      | 0     | 0  |
| Patient 14  | 57 | 196715 | 137221 | 134688 | 134474 | 20917  | 196711 | 20947  | 20916  | 16560  | 138100 | 138099 | 138096 | 20869  | 27011  | 27011  | 26994  |        | 0      | 0     | 0  |
| Patient 13  | 58 | 194338 | 135184 | 132599 | 132689 | 30674  | 194324 | 30660  | 30673  | 26677  | 136081 | 136080 | 136077 | 30578  | 4      | 4      | 19     | 27013  |        | 0     | 0  |
| Patient 16  | 59 | 179525 | 178707 | 177834 | 177886 | 175359 | 179533 | 175421 | 175356 | 177316 | 180086 | 180081 | 180084 | 175343 | 175287 | 175285 | 175270 | 177616 | 175289 |       | 0  |
| Patient 12  | 60 | 170076 | 163748 | 162809 | 162641 | 161522 | 170070 | 161590 | 161521 | 163389 | 164509 | 164508 | 164505 | 161506 | 161126 | 161126 | 161109 | 163483 | 161128 | 53225 |    |
