# Supplementary material for: Serratia marcescens Outbreak at a Correctional Facility: Environmental Sampling, Laboratory Analyses and Genomic Characterization to Assess Sources and Persistence
Source: MDPI journal article supplement (doi:10.3390/ijerph20176709), 2023-09-04
Supplement: s1 [file s1]

Table S4. Counts of anti-microbial resistance (AMR) genes identified in the assembled genomes.

| Sample IDs                                               | Total | BETA-LACTAM |   |   |   | AMINOGLYCOSIDE | AMINOGLYCOSIDE/<br>QUINOLONE | BLEOMYCIN | FOSFOMYCIN | MACROLIDE | PHENICOL | QUINOLONE | STREPTOTHRICIN | SULFONAMIDE | TETRACYCLINE |
|----------------------------------------------------------|-------|-------------|---|---|---|----------------|------------------------------|-----------|------------|-----------|----------|-----------|----------------|-------------|--------------|
|                                                          |       | A           | B | C | D |                |                              |           |            |           |          |           |                |             |              |
| Patient 1: Blood; 2021-Jan-02                            | 4     |             |   | 1 |   | 1              |                              |           | 1          |           |          |           |                |             | 1            |
| Patient 2-1: Blood; 2021-May-12                          | 4     |             |   | 1 |   | 1              |                              |           | 1          |           |          |           |                |             | 1            |
| Patient 2-2: Blood; 2021-May-12                          | 4     |             |   | 1 |   | 1              |                              |           | 1          |           |          |           |                |             | 1            |
| Patient 2-3: Blood; 2021-May-12                          | 4     |             |   | 1 |   | 1              |                              |           | 1          |           |          |           |                |             | 1            |
| Patient 3-1: Epidural abscess ; 2021-Jul-06              | 4     |             |   | 1 |   | 1              |                              |           | 1          |           |          |           |                |             | 1            |
| Patient 3-2: Epidural abscess; 2021-Jul-06               | 4     |             |   | 1 |   | 1              |                              |           | 1          |           |          |           |                |             | 1            |
| Patient 4: Wound; 2021-Jan-24                            | 4     |             |   | 1 |   | 1              |                              |           | 1          |           |          |           |                |             | 1            |
| Patient 5: Blood; 2021-Jan-11                            | 3     |             |   | 1 |   | 1              |                              |           | 1          |           |          |           |                |             |              |
| Patient 6: Wound; 2021-Aug-28                            | 4     |             |   | 1 |   | 1              |                              |           | 1          |           |          |           |                |             | 1            |
| Patient 7-1: Urine Catheter; 2021-Apr-09                 | 4     |             |   | 1 |   | 1              |                              |           | 1          |           |          |           |                |             | 1            |
| Patient 7-2: Blood; 2021-Apr-09                          | 4     |             |   | 1 |   | 1              |                              |           | 1          |           |          |           |                |             | 1            |
| Patient 7-3: Back Wound; 2021-Apr-13                     | 4     |             |   | 1 |   | 1              |                              |           | 1          |           |          |           |                |             | 1            |
| Patient 7-4: Back Wound; 2021-Apr-13                     | 4     |             |   | 1 |   | 1              |                              |           | 1          |           |          |           |                |             | 1            |
| Patient 8: Urine Catheter; 2021-Mar-11                   | 4     |             |   | 1 |   | 1              |                              |           | 1          |           |          |           |                |             | 1            |
| Patient 9: Blood; 2022-Jun-08                            | 4     |             |   | 1 |   | 1              |                              |           | 1          |           |          |           |                |             | 1            |
| Patient 10: Wound; 2022-Jul-11                           | 4     |             |   | 1 |   | 1              |                              |           | 1          |           |          |           |                |             | 1            |
| Patient 11: Blood; 2022-Aug-03                           | 4     |             |   | 1 |   | 1              |                              |           | 1          |           |          |           |                |             | 1            |
| Patient 12: Knee; 2022-April-08                          | 4     |             |   | 1 |   | 1              |                              |           | 1          |           |          |           |                |             | 1            |
| Patient 13: Abscess Tissue; 2022-Oct-13                  | 4     |             |   | 1 |   | 1              |                              |           | 1          |           |          |           |                |             | 1            |
| Patient 14: Urine catheter; 2022-Oct-09                  | 4     |             |   | 1 |   | 1              |                              |           | 1          |           |          |           |                |             | 1            |
| Patient 15: Blood; 2021-Aug-10                           | 4     |             |   | 1 |   | 1              |                              |           | 1          |           |          |           |                |             | 1            |
| Patient 16: Sputum; 2022-Oct-12                          | 4     |             |   | 1 |   | 1              |                              |           | 1          |           |          |           |                |             | 1            |
| Patient 17: Joint Fluid; 2021-Mar-12                     | 4     |             |   | 1 |   | 1              |                              |           | 1          |           |          |           |                |             | 1            |
| Patient 18: Blood; 2021-May-19                           | 3     |             |   | 1 |   | 1              |                              |           | 1          |           |          |           |                |             |              |
| Sample A-1: CB64 Dilution Machine; 2021-Mar-05           | 6     |             |   |   |   | 3              |                              |           | 1          |           |          |           |                |             | 1            |
| Sample A-2: CB64 Dilution Machine; 2021-Mar-05           | 6     |             |   |   |   | 3              |                              |           | 1          |           |          |           |                |             | 1            |
| Sample A-3: CB64 Dilution Machine; 2021-Mar-05           | 3     |             |   | 1 |   |                |                              |           | 1          |           |          |           |                |             | 1            |
| Sample B: Coffee from Cup; 2021-Jul-06                   | 3     |             |   | 1 |   | 1              |                              |           | 1          |           |          |           |                |             |              |
| Sample C: Nasacort w/ Methamphetamine; 2021-Jul-06       | 4     |             |   | 1 |   | 1              |                              |           | 1          |           |          |           |                |             | 1            |
| Sample D-1: Scrubbie; 2021-May-07                        | 4     |             |   | 1 |   | 1              |                              |           | 1          |           |          |           |                |             | 1            |
| Sample D-2: Scrubbie; 2021-May-07                        | 8     |             |   | 1 |   | 2              |                              |           | 1          |           |          | 2         | 1              |             | 1            |
| Sample E-1: Scrubbie; 2021-May-17                        | 4     |             |   | 1 |   | 1              |                              |           | 1          |           |          |           |                |             | 1            |
| Sample E-2: Scrubbie; 2021-May-17                        | 4     |             |   | 1 |   | 1              |                              |           | 1          |           |          |           |                |             | 1            |
| Sample F: Scrubbie 3; 2021-May-17                        | 3     |             |   | 1 |   |                |                              |           | 1          |           |          |           |                |             | 1            |
| Sample G: Shower Floor; 2021-Aug-04                      | 3     |             |   |   |   | 1              |                              |           |            |           |          |           |                |             |              |
| Sample H: Sterile Saline Hand Rinsate; 2021-Jul-08       | 3     |             |   | 1 |   | 1              |                              |           | 1          |           |          |           |                |             |              |
| Sample I-1: Surrendered Needles; 2021-May-17             | 4     |             |   | 1 |   | 1              |                              |           |            |           |          |           |                |             | 1            |
| Sample I-2: Surrendered Needles; 2021-May-17             | 4     |             |   | 1 |   | 1              |                              |           |            |           |          |           |                |             | 1            |
| Sample I-3: Surrendered Needles; 2021-May-17             | 4     |             |   | 1 |   | 1              |                              |           |            |           |          |           |                |             | 1            |
| Sample I-4: Surrendered Needles; 2021-May-17             | 4     |             |   | 1 |   | 1              |                              |           |            |           |          |           |                |             | 1            |
| Sample I-5: Surrendered Needles; 2021-May-17             | 4     |             |   | 1 |   | 1              |                              |           |            |           |          |           |                |             | 1            |
| Sample J: Detergent; 2021-Aug-13                         | 3     |             |   |   |   | 1              |                              |           | 1          |           |          |           |                |             |              |
| Sample K: Cleaner; 2021-Aug-13                           | 3     |             |   |   |   | 1              |                              |           | 1          |           |          |           |                |             |              |
| Sample L: Diluted CB64; 2021-Aug-04                      | 4     |             |   | 1 |   | 1              |                              |           |            |           |          |           |                |             | 1            |
| Sample M-1: Mop bucket; 2021-May-07                      | 4     |             |   | 1 |   | 1              |                              |           | 1          |           |          |           |                |             | 1            |
| Sample M-2: Mop bucket; 2021-May-07                      | 4     |             |   | 1 |   | 1              |                              |           | 1          |           |          |           |                |             | 1            |
| Sample N: CB64 in Bottle; 2021-May-17                    | 3     |             |   | 1 |   |                |                              |           | 1          |           |          |           |                |             | 1            |
| Sample O: CB64 in Bottle; 2021-Apr-21                    | 4     |             |   | 1 |   | 1              |                              |           | 1          |           |          |           |                |             | 1            |
| Sample P: CB64 in Coffee Container; 2021-Apr-21          | 4     |             |   | 1 |   | 1              |                              |           | 1          |           |          |           |                |             | 1            |
| Sample Q: Empty Gatorade Bottle; 2021-May-17             | 4     |             |   | 1 |   | 1              |                              |           | 1          |           |          |           |                |             | 1            |
| Sample R: Diluted Break Out from Trash Can 1; 2021-Aug-4 | 3     |             |   | 1 |   | 1              |                              |           | 1          |           |          |           |                |             |              |
| Sample S: Front Door Floor, D3-125; 2021-Sep-01          | 4     |             |   | 1 |   | 1              |                              |           | 1          |           |          |           |                |             | 1            |
| Sample T: Front Door Floor; 2021-Aug-4                   | 3     |             |   | 1 |   | 1              |                              |           | 1          |           |          |           |                |             |              |
| Sample U: Drinking Water in Bottle; 2021-Apr-21          | 3     |             |   | 1 |   | 1              |                              |           | 1          |           |          |           |                |             |              |
| Sample V: Break Out; 2021-May-07                         | 3     |             |   | 1 |   | 1              |                              |           | 1          |           |          |           |                |             |              |
| Sample W: Floor around Door; 2021-Aug-04                 | 3     |             |   | 1 |   | 1              |                              |           | 1          |           |          |           |                |             |              |
| Sample Y: Floor Around Door; 2021-Aug-04                 | 3     |             |   | 1 |   | 1              |                              |           | 1          |           |          |           |                |             |              |
| Sample Z: Bottle To Store Water; 2021-Sept-1             | 4     |             |   | 1 |   | 1              |                              |           | 1          |           |          |           |                |             | 1            |
| Sample AA: Bottle used as Urinal; 2021-Aug-13            | 3     |             |   | 1 |   | 1              |                              |           | 1          |           |          |           |                |             |              |
| Sample AB: Break Out from Trash Can; 2021-Aug-4          | 4     |             |   | 1 |   | 1              |                              |           | 1          |           |          |           |                |             | 1            |
| GCF_003031645.1 (Reference)                              | 11    | 3           |   |   | 1 | 4              |                              |           |            |           |          |           |                |             | 1            |
| Serratia liquefaciens_GCF_008364325                      | 4     |             |   | 1 |   |                |                              |           |            |           |          | 1         |                |             | 1            |
| Clinical_Germany_GCF_900029885.1                         | 4     |             |   | 1 |   | 1              |                              |           |            |           |          |           |                |             | 1            |
| Clinical_Japan_GCF_000828775                             | 8     |             | 1 | 2 |   | 2              |                              |           |            |           |          |           |                | 2           |              |
| Clinical_Mexico_GCF_001294565                            | 4     | 1           |   | 1 |   | 1              |                              |           |            |           |          |           |                |             |              |
| Clinical_Romania_GCF_002810285                           | 15    | 1           | 1 | 1 | 1 | 5              | 1                            | 1         |            |           | 1        |           |                | 2           |              |
| Clinical_Unknown_GCF_002947235                           | 3     |             |   | 1 |   | 1              |                              |           | 1          |           |          |           |                |             |              |
| Clinical_Unknown_GCF_00296885                            | 4     | 1           |   | 1 |   | 1              |                              |           | 1          |           |          |           |                |             |              |
| Clinical_USA_GCF_000783915.2                             | 3     |             |   | 1 |   | 1              |                              |           | 1          |           |          |           |                |             |              |
| Clinical_USA_GCF_001022215                               | 13    | 3           |   | 1 | 1 | 3              |                              |           | 1          |           | 2        |           |                | 1           | 1            |
| Clinical_USA_GCF_002220515                               | 4     |             |   | 1 |   | 1              |                              |           | 1          |           |          |           |                |             | 1            |
| Clinical_USA_GCF_002220535                               | 4     |             |   | 1 |   | 1              |                              |           | 1          |           |          |           |                |             | 1            |
| Clinical_USA_GCF_002220615                               | 4     |             |   | 1 |   | 1              |                              |           | 1          |           |          |           |                |             | 1            |
| Envi_China_GCF_001417865                                 | 4     |             |   | 1 |   | 1              |                              |           | 1          |           |          |           |                |             | 1            |
| Envi_Sweden_GCF_000513215                                | 4     |             |   | 1 |   | 1              |                              |           | 1          |           |          |           |                |             | 1            |
| Envi_Taiwan_GCF_000336425                                | 4     |             |   | 1 |   | 1              |                              |           | 1          |           |          |           |                |             | 1            |
