# Supplementary material for: Serratia marcescens Outbreak at a Correctional Facility: Environmental Sampling, Laboratory Analyses and Genomic Characterization to Assess Sources and Persistence
Source: MDPI journal article supplement (doi:10.3390/ijerph20176709), 2023-09-04
Supplement: s1 [file s1]

**Table S1.** Quality metrics and public repository information of the assembled whole genome sequences. Bolded samples are those selected for the PCA. NCBI ID was created by California Department of Public Health; therefore, is slightly different than this study (red text depicts a different ID). The NCBI Biosample Accession is linked to the raw reads and the assembled genome.

| Sample ID<br>(Sample ID-Isolate #; Source; Collection Date) | Phylogeny<br>Group # | Assembly Quality |           |          |                  |      |               |                     |              | Public Repository |                     |
|-------------------------------------------------------------|----------------------|------------------|-----------|----------|------------------|------|---------------|---------------------|--------------|-------------------|---------------------|
|                                                             |                      | Contig #         | N50       | Coverage | Genome<br>Length | GC%  | N/ 100<br>kbp | BUSCO %<br>complete | ORF<br>Count | NCBI ID           | Biosample Accession |
| Patient 1: Blood; 2021-Jan-02                               | 1                    | 58               | 5,301,542 | 169      | 5,394,984        | 59.0 | 122.5         | 96.8                | 5,133        | PatientA          | SAMN35676882        |
| Patient 2-1: Blood; 2021-May-12                             | 1                    | 64               | 5,306,262 | 137      | 5,401,881        | 59.0 | 122.4         | 96.8                | 5,022        | PatientB-1        | SAMN35676883        |
| Patient 2-2: Blood; 2021-May-12                             | 1                    | 57               | 5,309,218 | 219      | 5,391,866        | 59.0 | 118.8         | 96.8                | 5,006        | PatientB-2        | SAMN35676884        |
| Patient 2-3: Blood; 2021-May-12                             | 1                    | 49               | 5,301,457 | 180      | 5,395,710        | 59.0 | 127.9         | 96.8                | 5,133        | PatientB-3        | SAMN35676885        |
| Patient 3-1: Epidural abscess ; 2021-Jul-06                 | 1                    | 64               | 5,304,507 | 154      | 5,390,741        | 59.0 | 129.9         | 96.8                | 5,148        | PatientD-1        | SAMN35676886        |
| Patient 3-2: Epidural abscess; 2021-Jul-06                  | 1                    | 64               | 5,304,994 | 178      | 5,399,198        | 59.0 | 128.0         | 96.8                | 5,022        | PatientD-2        | SAMN35676887        |
| Patient 4: Wound; 2021-Jan-24                               | 1                    | 62               | 5,338,890 | 158      | 5,434,537        | 59.0 | 125.3         | 96.8                | 5,188        | PatientE          | SAMN35676888        |
| Patient 9: Blood; 2022-Jun-08                               | 1                    | 46               | 5,300,599 | 216      | 5,390,180        | 59.0 | 122.4         | 96.8                | 5,127        | PatientK          | SAMN35676897        |
| Patient 10: Wound; 2022-Jul-11                              | 1                    | 48               | 5,299,408 | 198      | 5,388,983        | 59.0 | 129.9         | 96.8                | 5,122        | PatientL          | SAMN35676898        |
| Patient 11: Blood; 2022-Aug-03                              | 1                    | 46               | 5,298,865 | 184      | 5,388,797        | 59.0 | 129.9         | 96.8                | 5,130        | PatientM          | SAMN35676899        |
| Patient 13: Abscess Tissue; 2022-Oct-13                     | 1                    | 62               | 5,278,662 | 102      | 5,373,929        | 59.1 | 121.1         | 96.8                | 4,990        | PatientO          | SAMN35676901        |
| Patient 15: Blood; 2021-Aug-10                              | 1                    | 59               | 5,306,933 | 158      | 5,401,047        | 59.0 | 122.4         | 96.8                | 5,019        | PatientR          | SAMN35676904        |
| Sample C: Nasacort w/ Methamphetamine; 2021-Jul-06          | 1                    | 67               | 5,302,635 | 182      | 5,388,975        | 59.0 | 129.9         | 96.8                | 5,143        | SampleC           | SAMN35676912        |
| Sample I-1: Surrendered Needles; 2021-May-17                | 1                    | 54               | 5,304,295 | 195      | 5,375,050        | 59.0 | 115.4         | 96.8                | 5,113        | SampleI-1         | SAMN35676920        |
| Sample I-2: Surrendered Needles; 2021-May-17                | 1                    | 55               | 5,302,865 | 195      | 5,393,292        | 59.0 | 107.7         | 96.8                | 5,002        | SampleI-2         | SAMN35676921        |
| Sample I-3: Surrendered Needles; 2021-May-17                | 1                    | 62               | 5,299,365 | 159      | 5,368,825        | 59.0 | 121.1         | 96.8                | 5,116        | SampleI-3         | SAMN35676922        |
| Sample I-4: Surrendered Needles; 2021-May-17                | 1                    | 56               | 5,304,592 | 176      | 5,394,463        | 59.0 | 115.1         | 96.8                | 5,005        | SampleI-4         | SAMN35676923        |
| Sample A-3: CB64 Dilution Machine; 2021-Mar-05              | 2                    | 83               | 5,123,078 | 150      | 5,435,345        | 58.8 | 167.4         | 96.8                | 5,194        | SampleA-1         | SAMN35676906        |
| Sample F: Scrubbie 3; 2021-May-17                           | 2                    | 68               | 5,165,856 | 173      | 5,370,501        | 58.9 | 141.5         | 96.8                | 5,152        | SampleF           | SAMN35676917        |
| Sample M-2: Mop bucket; 2021-May-07                         | 0                    | 67               | 5,331,327 | 122      | 5,405,278        | 58.9 | 161.2         | 96.8                | 5,075        | SampleM-1         | SAMN35676928        |
| Sample N: CB64 in Bottle; 2021-May-17                       | 2                    | 99               | 5,185,830 | 167      | 5,419,545        | 58.8 | 131.3         | 96.8                | 5,056        | SampleN           | SAMN35676930        |
| Patient 14: Urine catheter; 2022-Oct-09                     | 4                    | 97               | 5,262,059 | 133      | 5,530,557        | 58.6 | 150.4         | 96.8                | 5,171        | PatientP          | SAMN35676902        |
| Sample A-1: CB64 Dilution Machine; 2021-Mar-05              | 0                    | 54               | 5,309,929 | 182      | 5,478,639        | 59.3 | 140.7         | 96.8                | 5,207        | SampleA-2         | SAMN35676907        |
| Sample A-2: CB64 Dilution Machine; 2021-Mar-05              | 0                    | 49               | 5,324,940 | 106      | 5,474,114        | 59.6 | 115.2         | 96.8                | 5,112        | SampleA-3         | SAMN35676908        |
| Sample AB: Break Out from Trash Can; 2021-Aug-4             | 5                    | 65               | 5,295,535 | 95       | 5,456,494        | 59.1 | 165.2         | 96.8                | 5,064        | SampleAB          | SAMN35676910        |
| Sample D-2: Scrubbie; 2021-May-07                           | 5                    | 69               | 5,526,998 | 172      | 5,247,456        | 59.0 | 153.8         | 96.8                | 5,258        | SampleD-1         | SAMN35676913        |
| Sample M-1: Mop bucket; 2021-May-07                         | 4                    | 99               | 5,285,922 | 139      | 5,528,670        | 58.7 | 132.3         | 96.8                | 5,213        | SampleM-2         | SAMN35676929        |
| Patient 17: Joint Fluid; 2021-Mar-12                        | 3                    | 89               | 5,397,984 | 164      | 5,636,381        | 59.0 | 118.9         | 96.8                | 5,459        | PatientJ          | SAMN35676896        |
| Sample O: CB64 in Bottle; 2021-Apr-21                       | 6                    | 69               | 5,258,061 | 175      | 5,328,953        | 59.3 | 94.0          | 96.8                | 4,985        | SampleO           | SAMN35676931        |
| Sample L: Diluted CB64; 2021-Aug-04                         | 6                    | 68               | 5,209,298 | 141      | 5,307,802        | 59.3 | 111.2         | 96.8                | 5,055        | SampleL           | SAMN35676927        |
| Sample D-1: Scrubbie; 2021-May-07                           | 5                    | 101              | 5,336,904 | 155      | 5,530,767        | 59.2 | 135.9         | 96.8                | 5,224        | SampleD-2         | SAMN35676914        |
| Sample P: CB64 in Coffee Container; 2021-Apr-21             | 6                    | 78               | 5,251,314 | 177      | 5,327,907        | 58.7 | 97.8          | 96.8                | 4,992        | SampleP           | SAMN35676932        |
| Sample Q: Empty Gatorade Bottle; 2021-May-17                | 6                    | 75               | 5,210,729 | 202      | 5,343,117        | 59.2 | 97.5          | 96.8                | 4,984        | SampleQ           | SAMN35676933        |
| Sample R: Diluted Break Out from Trash Can 1; 2021-Aug-4    | 6                    | 88               | 5,138,946 | 199      | 5,384,944        | 58.9 | 195.3         | 96.8                | 5,015        | SampleR           | SAMN35676934        |
| Sample S: Front Door Floor, D3-125; 2021-Sep-01             | 6                    | 74               | 5,238,087 | 161      | 5,358,166        | 59.1 | 102.8         | 96.8                | 4,995        | SampleS           | SAMN35676935        |
| Sample T: Front Door Floor; 2021-Aug-4                      | 6                    | 87               | 5,139,978 | 155      | 5,380,664        | 58.9 | 193.6         | 96.8                | 5,010        | SampleT           | SAMN35676936        |
| Sample AA: Bottle used as Urinal; 2021-Aug-13               | 7                    | 38               | 5,149,531 | 175      | 5,328,097        | 59.7 | 43.2          | 96.0                | 4,868        | SampleAA          | SAMN35676909        |
| Sample J: Detergent; 2021-Aug-13                            | 7                    | 18               | 5,148,442 | 197      | 5,326,547        | 59.7 | 33.8          | 96.0                | 4,856        | SampleJ           | SAMN35676925        |
| Sample K: Cleaner; 2021-Aug-13                              | 7                    | 16               | 5,148,532 | 143      | 5,315,593        | 59.7 | 37.6          | 96.0                | 4,853        | SampleK           | SAMN35676926        |
| Sample U: Drinking Water in Bottle; 2021-Apr-21             | 7                    | 37               | 5,443,673 | 174      | 5,545,244        | 59.6 | 37.9          | 96.0                | 5,112        | SampleU           | SAMN35676937        |
| Sample V: Break Out; 2021-May-07                            | 0                    | 98               | 5,140,277 | 115      | 5,195,109        | 60.1 | 56.0          | 95.2                | 4,812        | SampleV           | SAMN35676938        |
| Sample W: Floor around Door; 2021-Aug-04                    | 0                    | 35               | 5,316,523 | 174      | 5,416,490        | 59.8 | 51.7          | 95.2                | 5,028        | SampleW           | SAMN35676939        |
| Patient 5: Blood; 2021-Jan-11                               | 8                    | 36               | 5,187,190 | 148      | 5,240,895        | 59.9 | 49.7          | 95.2                | 4,869        | PatientF          | SAMN35676889        |
| Patient 18: Blood; 2021-May-19                              | 0                    | 36               | 5,128,270 | 199      | 5,141,614        | 60.0 | 44.8          | 94.3                | 4,713        | PatientS          | SAMN35676905        |
| Sample B: Coffee from Cup; 2021-Jul-06                      | 8                    | 35               | 5,186,963 | 159      | 5,229,629        | 59.9 | 44.0          | 95.2                | 4,866        | SampleB           | SAMN35676911        |
| Sample G: Shower Floor; 2021-Aug-04                         | 0                    | 30               | 5,049,776 | 170      | 5,054,870        | 60.1 | 29.7          | 94.3                | 4,666        | SampleG           | SAMN35676918        |
| Sample H: Sterile Saline Hand Rinsate; 2021-Jul-08          | 8                    | 35               | 5,186,972 | 178      | 5,229,638        | 59.9 | 45.9          | 95.2                | 4,866        | SampleH           | SAMN35676919        |
| Sample Y: Floor Around Door; 2021-Aug-04                    | 8                    | 39               | 5,166,058 | 198      | 5,243,685        | 59.9 | 45.8          | 95.2                | 4,862        | SampleY           | SAMN35676940        |
| Patient 6: Wound; 2021-Aug-28                               | 10                   | 33               | 5,031,850 | 250      | 5,038,040        | 59.6 | 43.7          | 96.0                | 4,728        | PatientG          | SAMN35676890        |
| Patient 7-1: Urine Catheter; 2021-Apr-09                    | 9                    | 23               | 4,997,111 | 172      | 5,007,736        | 59.7 | 28.0          | 96.0                | 4,623        | PatientH-1        | SAMN35676891        |
| Patient 7-2: Blood; 2021-Apr-09                             | 9                    | 24               | 4,996,931 | 174      | 5,004,684        | 59.7 | 30.0          | 96.0                | 4,687        | PatientH-2        | SAMN35676892        |
| Patient 7-3: Back Wound; 2021-Apr-13                        | 9                    | 23               | 4,997,213 | 169      | 5,007,838        | 59.7 | 30.0          | 96.0                | 4,620        | PatientH-3        | SAMN35676893        |
| Patient 7-4: Back Wound; 2021-Apr-13                        | 9                    | 24               | 4,996,894 | 191      | 5,007,694        | 59.7 | 28.0          | 96.0                | 4,622        | PatientH-4        | SAMN35676894        |
| Sample E-1: Scrubbie; 2021-May-17                           | 11                   | 26               | 4,944,991 | 201      | 4,955,211        | 59.8 | 30.3          | 96.0                | 4,582        | SampleE-1         | SAMN35676915        |
| Sample Z: Bottle To Store Water; 2021-Sept-1                | 10                   | 36               | 5,031,036 | 213      | 5,044,026        | 59.6 | 49.6          | 96.0                | 4,656        | SampleZ           | SAMN35676941        |
| Patient 8: Urine Catheter; 2021-Mar-11                      | 0                    | 38               | 5,271,589 | 187      | 5,287,127        | 59.3 | 35.9          | 96.0                | 5,056        | PatientI          | SAMN35676895        |
| Patient 12: Knee; 2022-April-08                             | 0                    | 16               | 5,087,127 | 145      | 5,098,696        | 59.7 | 41.2          | 96.0                | 4,759        | PatientN          | SAMN35676900        |
| Patient 16: Sputum; 2022-Oct-12                             | 0                    | 17               | 5,143,969 | 156      | 5,152,647        | 59.7 | 42.7          | 96.0                | 4,785        | PatientQ          | SAMN35676903        |
| Sample E-2: Scrubbie; 2021-May-17                           | 11                   | 23               | 4,945,474 | 230      | 4,951,361        | 59.8 | 34.3          | 96.0                | 4,586        | SampleE-2         | SAMN35676916        |
| Sample I-5: Surrendered Needles; 2021-May-17                | 11                   | 26               | 4,944,943 | 195      | 4,955,162        | 59.8 | 30.3          | 96.0                | 4,582        | SampleI-5         | SAMN35676924        |
