# Supplementary material for: Serratia marcescens Outbreak at a Correctional Facility: Environmental Sampling, Laboratory Analyses and Genomic Characterization to Assess Sources and Persistence
Source: Int J Environ Res Public Health. 2023 Sep 4;20(17):6709. doi: 10.3390/ijerph20176709 (PMC10487681; doi:10.3390/ijerph20176709)
Supplement: Supplementary file 1 [file ijerph-20-06709-s001.zip]

Archive with 5 entries (5 files):
- ijerph-2510348 - Supplementary Material S1 (Figure S1).pdf
- ijerph-2510348 - Supplementary Material S2 (Figure S2).pdf
- ijerph-2510348 - Supplementary Material S3 (Table S1).pdf
- ijerph-2510348 - Supplementary Material S4 (Tables S2 and S3).pdf
- ijerph-2510348 - Supplementary Material S5 (Table S4).pdf
