# Supplementary figures and images for: Serratia marcescens Outbreak at a Correctional Facility: Environmental Sampling, Laboratory Analyses and Genomic Characterization to Assess Sources and Persistence
Source: MDPI journal article supplement (doi:10.3390/ijerph20176709), 2023-09-04

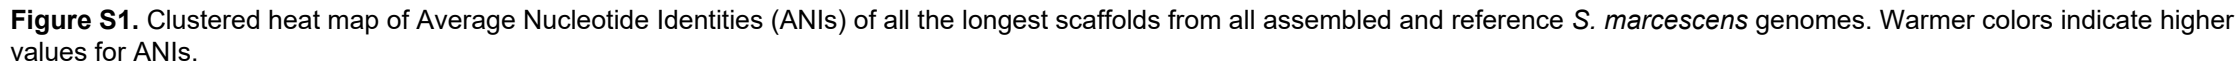

Supplement: s1 [file s1]
